# Supplementary material
Source: Elsevier journal article supplement (https://www.sciencedirect.com/science/article/pii/S169726001830005X)
Supplement: mmc1 [file S169726001830005X:mmc1.docx]

**Appendix S**tudies analysed.

Armstrong, N. C., & Ernst, E. (2001). A randomized, double-blind, placebo-controlled trial of a Bach Flower Remedy. *Complementary Therapies in Nursing and Midwifery*, *7*, 215–221. https://doi.org/10.1054/ctnm.2001.0525

Barnhofer, T., & Chittka, T. (2010). Cognitive reactivity mediates the relationship between neuroticism and depression. *Behaviour Research and Therapy*, *48*, 275–281. https://doi.org/10.1016/j.brat.2009.12.005

Bartram, D. (1995). The predictive validity of the EPI and 16PF for military flying training. *Journal of Occupational and Organizational Psychology*, *68*, 219–236. https://doi.org/10.1111/j.2044-8325.1995.tb00583.x

Baumann, C., Klauke, B., Domschke, K., Fassbinder, F., Gartmann, N., Kalisch, R., Reif, A., Deckert, J., & Pauli, P. (2013). Die gemeinsamen und spezifischen Komponenten von Depression und Angst. *Zeitschrift Für Klinische Psychologie Und Psychotherapie*, *42*, 230–241. https://doi.org/10.1026/1616-3443/a000225

Baur, V., Hänggi, J., & Jäncke, L. (2012). Volumetric associations between uncinate fasciculus, amygdala, and trait anxiety. *BMC Neuroscience*, *13*, 4. https://doi.org/10.1186/1471-2202-13-4

Becker, E. S., Türke, V., Neumer, S., Soeder, U., Krause, P., & Margraf, J. (2000). Incidence and prevalence rates of mental disorders in a community sample of young women: Results of the Dresden Study. InG. Heeß-Erler, R. Manz, & W. Kirch (Eds.), *Public health research and practice: Report of the Public Health Research Association Saxony 1998-1999* (Volume II, pp. 259-291).Regensburg: Roderer.

Biebrich, R., & Kuhl, J. (2002). Neurotizismus und Kreativität: Strukturelle Unterschiede in der Beeinflussung kreativer Leistung. *Zeitschrift Für Differentielle Und Diagnostische Psychologie*, *23*, 171–190. https://doi.org/10.1024//0170-1789.23.2.171

Blackburn, I. M., Cameron, C. M., & Deary, I. J. (1990). Individual differences and response to the Velten mood induction procedure. *Personality and Individual Differences*, *11*, 725–731. https://doi.org/10.1016/0191-8869(90)90258-S

Boll, S., & Gamer, M. (2014). 5-HTTLPR modulates the recognition accuracy and exploration of emotional facial expressions. *Frontiers in Behavioral Neuroscience*, *8*, e0168307. https://doi.org/10.3389/fnbeh.2014.00255

Borkenau, P., & Mauer, N. (2007). Well-being and the accessibility of pleasant and unpleasant concepts. *European Journal of Personality*, *21*, 169–189. https://doi.org/10.1002/per.613

Bradley, B. F., Brown, S. L., Chu, S., & Lea, R. W. (2009). Effects of orally administered lavender essential oil on responses to anxiety-provoking film clips. *Human Psychopharmacology*, *24*, 319–330. https://doi.org/10.1002/hup.1016

Brühl, A. B., Hänggi, J., Baur, V., Rufer, M., Delsignore, A., Weidt, S., Jäncke, L., & Herwig, U. (2014). Increased cortical thickness in a frontoparietal network in social anxiety disorder. *Human Brain Mapping*, *35*, 2966–2977. https://doi.org/10.1002/hbm.22378

Buchmann, A. F., Hellweg, R., Rietschel, M., Treutlein, J., Witt, S. H., Zimmermann, U. S., Schimidt, M. H., Banaschecwki, T., & Deuschle, M. (2013). BDNF Val 66 Met and 5-HTTLPR genotype moderate the impact of early psychosocial adversity on plasma brain-derived neurotrophic factor and depressive symptoms: A prospective study. *European Neuropsychopharmacology*, *23*, 902–909. https://doi.org/10.1016/j.euroneuro.2012.09.003

Burch, G. S. J., Hemsley, D. R., Pavelis, C., & Corr, P. J. (2006). Personality, creativity and latent inhibition. *European Journal of Personality*, *20*, 107–122. https://doi.org/10.1002/per.572

Butler, G. K. L., & Montgomery, A. M. J. (2005). Subjective self-control and behavioural impulsivity coexist in anorexia nervosa. *Eating Behaviors*, *6*, 221–227. https://doi.org/10.1016/j.eatbeh.2004.11.002

Byrom, N. C., Msetfi, R. M., & Murphy, R. A. (2015). Two pathways to causal control: Use and availability of information in the environment in people with and without signs of depression. *Acta Psychologica*, *157*, 1–12. https://doi.org/10.1016/j.actpsy.2015.02.004

Caselli, G., Bortolai, C., Leoni, M., Rovetto, F., & Spada, M. M. (2008). Rumination in problem drinkers. *Addiction Research & Theory*, *16*, 564–571.

Cheng, H., & Furnham, A. (2003). Personality, self-esteem, and demographic predictions of happiness and depression. *Personality and Individual Differences*, *34*, 921–942. https://doi.org/10.1016/S0191-8869(02)00078-8

Chou, C.-Y., La Marca, R., Steptoe, A., & Brewin, C. R. (2014). Biological responses to trauma and the development of intrusive memories: An analog study with the trauma film paradigm. *Biological Psychology*, *103*, 135–143. https://doi.org/10.1016/j.biopsycho.2014.08.002

Colonnello, V., Chen, F. S., Panksepp, J., & Heinrichs, M. (2013). Oxytocin sharpens self-other perceptual boundary. *Psychoneuroendocrinology*, *38*, 2996–3002. https://doi.org/10.1016/j.psyneuen.2013.08.010

Cope, C. D., Lyons, A. C., Donovan, V., Rylance, M., & Kilby, M. D. (2003). Providing letters and audiotapes to supplement a prenatal diagnostic consultation: effects on later distress and recall. *Prenatal Diagnosis*, *23*, 1060–1067. https://doi.org/10.1002/pd.747

Corr, P. J., & Gray, J. A. (1996). Structure and validity of the Attributional Style Questionnaire: A cross-sample comparison. *The Journal of Psychology*, *130*, 645–657.

Corr, P. J., Pickering, A. D., & Gray, J. A. (1995). Personality and reinforcement in associative and instrumental learning. *Personality and Individual Differences*, *19*, 47–71. https://doi.org/10.1016/0191-8869(95)00013-V

Corulla, W. J. (1989). The relationships between the strelau temperament inventory, sensation seeking and Eysenck’s dimensional system of personality. *Personality and Individual Differences*, *10*, 161–173. https://doi.org/10.1016/0191-8869(89)90200-6

Cramer, D. (1993). Personality and marital dissolution. *Personality and Individual Differences*, *14*, 605–607. https://doi.org/10.1016/0191-8869(93)90155-V

Croy, I., Negoias, S., Novakova, L., Landis, B. N., & Hummel, T. (2012). Learning about the Functions of the Olfactory System from People without a Sense of Smell. *PLOS ONE*, *7*, e33365. https://doi.org/10.1371/journal.pone.0033365

Dannlowski, U., Kugel, H., Huber, F., Stuhrmann, A., Redlich, R., Grotegerd, D., Dohm. K., Sehlmeyer, C., Konrad, C., Baune, B. T., Arolt, V., Heidels, W., Zwitserlood, P., & Suslow, T. (2013). Childhood maltreatment is associated with an automatic negative emotion processing bias in the amygdala. *Human Brain Mapping*, *34*), 2899–2909. https://doi.org/10.1002/hbm.22112

Ditzen, B., Neumann, I. D., Bodenmann, G., Dawans, B. von, Turner, R. A., Ehlert, U., & Heinrichs, M. (2007). Effects of different kinds of couple interaction on cortisol and heart rate responses to stress in women. *Psychoneuroendocrinology*, *32*, 565–574. https://doi.org/10.1016/j.psyneuen.2007.03.011

Dowrick, C. F., Bellón, J. A., & Gómez, M. J. (2000). GP frequent attendance in Liverpool and Granada: the impact of depressive symptoms. *The British Journal of General Practice: The Journal of the Royal College of General Practitioners*, *50*, 361–365.

Dreifus, L., Engler, H., & Kissler, J. (2014). Retrieval-induced forgetting under psychosocial stress: No reduction by delayed stress and beta-adrenergic blockade. *Neurobiology of Learning and Memory*, *110*, 35–46. https://doi.org/10.1016/j.nlm.2014.01.010

du Prel, J.-B., & Peter, R. (2015). Work-family conflict as a mediator in the association between work stress and depressive symptoms: Cross-sectional evidence from the German lidA-cohort study. *International Archives of Occupational and Environmental Health*, *88*, 359–368. https://doi.org/10.1007/s00420-014-0967-0

Eggert, O. (1974). *Eysenck-Persönlichkeits-Inventar EPI*. 1. Auflage, Göttingen: Hogrefe.

Egloff, B., & Hock, M. (1997). A comparison of two approaches to the assessment of coping styles. *Personality and Individual Differences*, *23*, 913–916. https://doi.org/10.1016/S0191-8869(97)00102-5

Egloff, B., & Schmukle, S. C. (2002). Predictive validity of an Implicit Association Test for assessing anxiety. *Journal of Personality and Social Psychology*, *83*, 1441–1455.

Egloff, B., & Schmukle, S. C. (2003). Does social desirability moderate the relationship between implicit and explicit anxiety measures? *Personality and Individual Differences*, *35*, 1697–1706. https://doi.org/10.1016/S0191-8869(02)00391-4

Egloff, B., & Schmukle, S. C. (2004). Gender differences in implicit and explicit anxiety measures. *Personality and Individual Differences*, *36*, 1807–1815. https://doi.org/10.1016/j.paid.2003.07.002

Ehlers, A., Mayou, R. A., Sprigings, D. C., & Birkhead, J. (2000). Psychological and perceptual factors associated with arrhythmias and benign palpitations. *Psychosomatic Medicine*, *62*, 693–702.

Emery, C. F., Huppert, F. A., & Schein, R. L. (1996). Health and personality predictors of psychological functioning in a 7-year longitudinal study. *Personality and Individual Differences*, *20*, 567–573. https://doi.org/10.1016/0191-8869(95)00219-7

Faith, M. S., Flint, J., Fairburn, C. G., Goodwin, G. M., & Allison, D. B. (2001). Gender differences in the relationship between personality dimensions and relative body weight. *Obesity Research*, *9*, 647–650. https://doi.org/10.1038/oby.2001.86

Försterling, F., & Bühner, M. (2003). Attributional Veridicality and Evaluative Beliefs: How do they Contribute to Depression? *Journal of Social and Clinical Psychology*, *22*, 369–392. https://doi.org/10.1521/jscp.22.4.369.22894

Francis, L. J. (1998). Happiness is a thing called stable extraversion: A further examination of the relationship between the Oxford Happiness Inventory and Eysencks dimensional model of personality and gender. *Personality and Individual Differences*, *26*, 5–11. https://doi.org/10.1016/S0191-8869(98)00185-8

Francis, L. J., & Wilcox, C. (1998). The relationship between Eysenck’s personality dimensions and Bem’s masculinity and femininity scales revisited. *Personality and Individual Differences*, *25*, 683–687. https://doi.org/10.1016/S0191-8869(98)00085-3

Furnham, A., & Cheng, H. (2000). Perceived parental behaviour, self-esteem and happiness. *Social Psychiatry and Psychiatric Epidemiology*, *35*, 463–470.

Furnham, A., & Miller, T. (1997). Personality, absenteeism and productivity. *Personality and Individual Differences*, *23*, 705–707. https://doi.org/10.1016/S0191-8869(97)00092-5

Garden, G. M., & Ayres, J. G. (1993). Psychiatric and social aspects of brittle asthma. *Thorax*, *48*, 501–505.

Gibson, H. B., & Corcoran, M. E. (1975). Personality and differential susceptibility to hypnosis: further replication and sex differences. *British Journal of Psychology*, *66*, 513–520.

Glotzbach-Schoon, E., Andreatta, M., Reif, A., Ewald, H., Tröger, C., Baumann, C., Deckert, J., Mühlberger, A., & Pauli, P. (2013). Contextual fear conditioning in virtual reality is affected by 5HTTLPR and NPSR1 polymorphisms: Effects on fear-potentiated startle. *Frontiers in Behavioral Neuroscience*, *7*, 31. https://doi.org/10.3389/fnbeh.2013.00031

Grabe, H. J., Schwahn, C., Mahler, J., Schulz, A., Spitzer, C., Fenske, K., Appel, K., Barnow, S., Nauck, M., Shomerus, G, Biffar, R., Rosskopfof, D., John, U., Völzke, H., & Freyberger, H. J. (2012). Moderation of adult depression by the serotonin transporter promoter variant (5-HTTLPR), childhood abuse and adult traumatic events in a general population sample. *American Journal of Medical Genetics*, *159B*, 298–309. https://doi.org/10.1002/ajmg.b.32027

Hagger-Johnson, G., Roberts, B., Boniface, D., Sabia, S., Batty, G. D., Elbaz, A., Singh-Manoux, A., & Deary, I. J. (2012). Neuroticism and cardiovascular disease mortality: Socioeconomic status modifies the risk in women (UK Health and Lifestyle Survey). *Psychosomatic Medicine*, *74*, 596–603. https://doi.org/10.1097/PSY.0b013e31825c85ca

Hampel, S., Weis, S., Hiller, W., & Witthöft, M. (2011). The relations between social anxiety and social intelligence: A latent variable analysis. *Journal of Anxiety Disorders*, *25*, 545–553. https://doi.org/10.1016/j.janxdis.2011.01.001

Hautzinger, M. (1991). The Beck Depression Inventory in clinical practice. *Der Nervenarzt*, *62*, 689–696.

Herbert, B. M., Blechert, J., Hautzinger, M., Matthias, E., & Herbert, C. (2013). Intuitive eating is associated with interoceptive sensitivity. Effects on body mass index. *Appetite*, *70*, 22–30. https://doi.org/10.1016/j.appet.2013.06.082

Herbert, B. M., Herbert, C., & Pollatos, O. (2011). On the relationship between interoceptive awareness and alexithymia: Is interoceptive awareness related to emotional awareness? *Journal of Personality*, *79*, 1149–1175. https://doi.org/10.1111/j.1467-6494.2011.00717.x

Hermann, A., Küpper, Y., Schmitz, A., Walter, B., Vaitl, D., Hennig, J., Stark, R., & Tabbert, K. (2012). Functional gene polymorphisms in the serotonin system and traumatic life events modulate the neural basis of fear acquisition and extinction. *PloS One*, *7*, e44352. https://doi.org/10.1371/journal.pone.0044352

Hood, S. D., Hince, D. A., Robinson, H., Cirillo, M., Christmas, D., & Kaye, J. M. (2006). Serotonin regulation of the human stress response. *Psychoneuroendocrinology*, *31*, 1087–1097. https://doi.org/10.1016/j.psyneuen.2006.07.001

Hoyer, J., Gloster, A. T., & Herzberg, P. Y. (2009). Is worry different from rumination? Yes, it is more predictive of psychopathology! *GMS Psycho-Social-Medicine*, *6*. https://doi.org/10.3205/psm000062

Hulbert-Williams, N. J., Hulbert-Williams, S. L., McIlroy, D., & Bunting, B. (2008). Anxiety in recovery from severe burn injury: an experimental comparison. *Psychology, Health & Medicine*, *13*, 162–167. https://doi.org/10.1080/13548500701352701

Jackson, C. J., & Francis, L. J. (1998). Interpreting the correlation between neuroticism and lie scale scores. *Personality and Individual Differences*, *26*, 59–63.

Kaltner, S., & Jansen, P. (2014). Emotion and affect in mental imagery: do fear and anxiety manipulate mental rotation performance? *Frontiers in Psychology*, *5*. https://doi.org/10.3389/fpsyg.2014.00792

Katzer, A., Oberfeld, D., Hiller, W., & Witthöft, M. (2011). Tactile perceptual processes and their relationship to medically unexplained symptoms and health anxiety. *Journal of Psychosomatic Research*, *71*, 335–341. https://doi.org/10.1016/j.jpsychores.2011.03.009

Khan, R. S., Marlow, C., & Head, A. (2008). Physiological and psychological responses to a 12-week BodyBalance training programme. *Journal of Science and Medicine in Sport*, *11*, 299–307. https://doi.org/10.1016/j.jsams.2007.04.005

Kiem, S. A., Andrade, K. C., Spoormaker, V. I., Holsboer, F., Czisch, M., & Sämann, P. G. (2013). Resting state functional MRI connectivity predicts hypothalamus-pituitary-axis status in healthy males. *Psychoneuroendocrinology*, *38*, 1338–1348. https://doi.org/10.1016/j.psyneuen.2012.11.021

Klaperski, S., von Dawans, B., Heinrichs, M., & Fuchs, R. (2013). Does the level of physical exercise affect physiological and psychological responses to psychosocial stress in women? *Psychology of Sport and Exercise*, *14*, 266–274. https://doi.org/10.1016/j.psychsport.2012.11.003

Kliem, S., Mößle, T., Zenger, M., & Brähler, E. (2014). Reliability and validity of the beck depression inventory-fast screen for medical patients in the general German population. *Journal of Affective Disorders*, *156*, 236–239. https://doi.org/10.1016/j.jad.2013.11.024

Klumb, P. L. (1995). Cognitive failures and performance differences: validation studies of a German version of the cognitive failures questionnaire. *Ergonomics*, *38*, 1456–1467. https://doi.org/10.1080/00140139508925202

Kohlmann, C.-W. (1993). Rigid and flexible modes of coping: Related to coping style? *Anxiety, Stress, & Coping*, *6*, 107–123. https://doi.org/10.1080/10615809308248373

Kohls, N., Sauer, S., & Walach, H. (2009). Facets of mindfulness – Results of an online study investigating the Freiburg mindfulness inventory. *Personality and Individual Differences*, *46*, 224–230. https://doi.org/10.1016/j.paid.2008.10.009

Kröner-Herwig, B., Gaßmann, J., Tromsdorf, M., & Zahrend, E. (2012). The effects of sex and gender role on responses to pressure pain. *GMS Psycho-Social-Medicine*, *9*. https://doi.org/10.3205/psm000079

Kühn, S., Schubert, F., & Gallinat, J. (2011). Structural correlates of trait anxiety: Reduced thickness in medial orbitofrontal cortex accompanied by volume increase in nucleus accumbens. *Journal of Affective Disorders*, *134*, 315–319. https://doi.org/10.1016/j.jad.2011.06.003

Kühn, S., Vanderhasselt, M.-A., De Raedt, R., & Gallinat, J. (2014). The neural basis of unwanted thoughts during resting state. *Social Cognitive and Affective Neuroscience*, *9*, 1320–1324. https://doi.org/10.1093/scan/nst117

Lass-Hennemann, J., Peyk, P., Streb, M., Holz, E., & Michael, T. (2014). Presence of a dog reduces subjective but not physiological stress responses to an analog trauma. *Frontiers in Psychology*, *5*. https://doi.org/10.3389/fpsyg.2014.01010

Lauer, C. J., Zerssen, D. von, Schreiber, W., Modell, S., Holsboer, F., & Krieg, J.-C. (1998). The pre-morbid psychometric profile is stable over time in subjects at high familial risk for affective disorders. *Journal of Affective Disorders*, *51*, 45–53. https://doi.org/10.1016/S0165-0327(98)00155-4

Lee, D. M., Tajar, A., O’Neill, T. W., O’Connor, D. B., Bartfai, G., Boonen, S., Bouillon, R:, Casanueva, F. F., Finn, J. D., Forti, G., Giwercman, A., Han, T. S., Hutaniemi, I. T., Kula, K., Lean, M. E., Punab, M., Silman, A. J., Vanderschuern, D., Wu, F. C., Pendleton, N., & EMAS study group (2011). Lower vitamin D levels are associated with depression among community-dwelling European men. *Journal of Psychopharmacology*, *25*, 1320–1328. https://doi.org/10.1177/0269881110379287

Lueken, U., Muehlhan, M., Evens, R., Wittchen, H.-U., & Kirschbaum, C. (2012). Within and between session changes in subjective and neuroendocrine stress parameters during magnetic resonance imaging: A controlled scanner training study. *Psychoneuroendocrinology*, *37*, 1299–1308. https://doi.org/10.1016/j.psyneuen.2012.01.003

Man, M. S., MacMillan, I., Scott, J., & Young, A. H. (1999). Mood, neuropsychological function and cognitions in premenstrual dysphoric disorder. *Psychological Medicine*, *29*, 727–733.

Mansell, W., Clark, D. M., Ehlers, A., & Chen, Y.-P. (1999). Social Anxiety and Attention away from Emotional Faces. *Cognition and Emotion*, *13*, 673–690. https://doi.org/10.1080/026999399379032

Martin, A., Rief, W., Klaiberg, A., & Braehler, E. (2006). Validity of the Brief Patient Health Questionnaire Mood Scale (PHQ-9) in the general population. *General Hospital Psychiatry*, *28*, 71–77. https://doi.org/10.1016/j.genhosppsych.2005.07.003

Mascie-Taylor, C. G. N., & Vandenberg, S. G. (1988). Assortative mating for IQ and personality due to propinquity and personal preference. *Behavior Genetics*, *18*, 339–345. https://doi.org/10.1007/BF01260934

Merten, T., & Ruch, W. (1996). A comparison of computerized and conventional administration of the German versions of the Eysenck Personality Questionnaire and the Carroll Rating Scale for Depression. *Personality and Individual Differences*, *20*, 281–291. https://doi.org/10.1016/0191-8869(95)00185-9

Miles, A., McManus, C., Feinmann, C., Glover, L., Harrison, S., & Pearce, S. (2001). The factor structure of the BDI in facial pain and other chronic pain patients: a comparison of two models using confirmatory factor analysis. *British Journal of Health Psychology*, *6*, 179–196. https://doi.org/10.1348/135910701169142

Morrison, C. M., & Gore, H. (2010). The relationship between excessive Internet use and depression: A questionnaire-based study of 1,319 young people and adults. *Psychopathology*, *43*, 121–126. https://doi.org/10.1159/000277001

Mutschler, J., Abbruzzese, E., Goltz, C. von der, Dinter, C., Mobascher, A., Thiele, H., Diaz-Lac ava, A., Dahmen, N., Gallinat, J., Majic, T., Petrovsky, N., Kornhuber, J., Thuerauf, N., Gründer, G., Brinkmeyer, J., Wienker, T., Wagner, M., Wintererr, G., & Kiefer, F. (2012). Genetic Variation in the Neuropeptide Y Gene Promoter Is Associated with Increased Risk of Tobacco Smoking. *European Addiction Research*, *18*(5), 246–252. https://doi.org/10.1159/000338276

Osinsky, R., Reuter, M., Küpper, Y., Schmitz, A., Kozyra, E., Alexander, N., & Hennig, J. (2008). Variation in the serotonin transporter gene modulates selective attention to threat. *Emotion*, *8*, 584–588. https://doi.org/10.1037/a0012826

Paul, V. G., Rauch, A. V., Kugel, H., ter Horst, L., Bauer, J., Dannlowski, U., Ihrmann, P., Lindner, C., Uta-Susan, D., Kersting, A., Egloff, B., & Suslow, T. (2012). High responsivity to threat during the initial stage of perception in repression: a 3 T fMRI study. *Social Cognitive and Affective Neuroscience*, *7*, 980–990. https://doi.org/10.1093/scan/nsr080

Platte, P., Herbert, C., Pauli, P., & Breslin, P. A. S. (2013). Oral Perceptions of Fat and Taste Stimuli Are Modulated by Affect and Mood Induction. *PLOS ONE*, *8*, e65006. https://doi.org/10.1371/journal.pone.0065006

Ploubidis, G. B., & Frangou, S. (2011). Neuroticism and psychological distress: To what extent is their association due to person-environment correlation? *European Psychiatry*, *26*, 1–5. https://doi.org/10.1016/j.eurpsy.2009.11.003

Premkumar, P., Ettinger, U., Inchley-Mort, S., Sumich, A., Williams, S. C. R., Kuipers, E., & Kumari, V. (2012). Neural processing of social rejection: The role of schizotypal personality traits. *Human Brain Mapping*, *33*, 695–706. https://doi.org/10.1002/hbm.21243

Rammsayer, T. H. (1997). On the relationship between personality and time estimation. *Personality and Individual Differences*, *23*, 739–744. https://doi.org/10.1016/S0191-8869(97)00117-7

Rauch, A. V., Horst, L. ter, Paul, V. G., Bauer, J., Dannlowski, U., Konrad, C., Ohrmann, P., Kugel, H. Egloff, B., Arolt, V., & Suslow, T. (2014). Influence of Repressive Coping Style on Cortical Activation during Encoding of Angry Faces. *PLOS ONE*, *9*, e112398. https://doi.org/10.1371/journal.pone.0112398

Reicherts, M., & Perrez, M. (1990). *Einflüsse von Repression und Sensitization auf die Selbstbeobachtung der Belastungsverarbeitung*.

Ridder, S., Treutlein, J., Nees, F., Lang, S., Diener, S., Wessa, M., Kroll, A., Pohlack, S., Cacciaglia, R., Gass, P, Schütz, G., Schumann, G., & Flor, H. (2012). Brain activation during fear conditioning in humans depends on genetic variations related to functioning of the hypothalamic–pituitary–adrenal axis: First evidence from two independent subsamples. *Psychological Medicine*, *42*, 2325–2335. https://doi.org/10.1017/S0033291712000359

Rohmann, E., & Bierhoff, H.-W. (2013). Geschlechtsrollen-Selbstkonzept und Beeinträchtigung des psychischen Wohlbefindens bei jungen Frauen. *Zeitschrift für Gesundheitspsychologie*, *21*, 177–190.

Rohrmann, S., Schienle, A., Hodapp, V., & Netter, P. (2004). Experimentelle Überprüfung des Fragebogens zur Erfassung der Ekelempfindlichkeit (FEE). *Zeitschrift Für Klinische Psychologie Und Psychotherapie*, *33*, 91–100. https://doi.org/10.1026/0084-5345.33.2.91

Roiser, J. P., & Sahakian, B. J. (2004). Relationship between ecstasy use and depression: A study controlling for poly-drug use. *Psychopharmacology*, *173*, 411–417. https://doi.org/10.1007/s00213-003-1705-6

Rollnik, J. D., Schmitz, N., & Kugler, J. (1999). Anxiety moderates cardiovascular responses to painful stimuli during sphygmomanometry. *International Journal of Psychophysiology*, *33*, 253–257. https://doi.org/10.1016/S0167-8760(99)00065-3

Rothemund, Y., Paepke, S., & Flor, H. (2001). Perception of risk, anxiety, and health behaviors in women at high risk for breast cancer. *International Journal of Behavioral Medicine*, *8*, 230–239. https://doi.org/10.1207/S15327558IJBM0803_5

Roy, M., Kirschbaum, C., & Steptoe, A. (2003). Intraindividual variation in recent stress exposure as a moderator of cortisol and testosterone levels. *Annals of Behavioral Medicine: A Publication of the Society of Behavioral Medicine*, *26*, 194–200.

Roy, M. P., Kirschbaum, C., & Steptoe, A. (2001). Psychological, cardiovascular, and metabolic correlates of individual differences in cortisol stress recovery in young men. *Psychoneuroendocrinology*, *26*, 375–391. https://doi.org/10.1016/S0306-4530(00)00061-5

Roy, M. P., & Steptoe, A. (1994). Daily stressors and social support availability as predictors of depressed mood in male firefighters. *Work & Stress*, *8*, 210–219. https://doi.org/10.1080/02678379408259993

Ruch, W. (1992). Pavlov’s types of nervous system, Eysenck’s typology and the Hippocrates-Galen temperaments: An empirical examination of the asserted correspondence of three temperament typologies. *Personality and Individual Differences*, *13*, 1259–1271. https://doi.org/10.1016/0191-8869(92)90168-O

Ryan, L., Leavey, G., Golden, A., Blizard, R., & King, M. (2006). Depression in Irish migrants living in London: Case-control study. *The British Journal of Psychiatry: The Journal of Mental Science*, *188*, 560–566. https://doi.org/10.1192/bjp.188.6.560

Schaller, G., Lenz, B., Friedrich, K., Dygon, D., Richter-Schmidinger, T., Jacobi, A., Mueller, S. E., Maihöfner, C., Speriling, W., & Kornhuber, J. (2011). Repetitive transcranial magnetic stimulation influences mood in healthy male volunteers. *Journal of Psychiatric Research*, *45*, 1178–1183. https://doi.org/10.1016/j.jpsychires.2011.02.006

Schedlowski, M., Flüge, T., Richter, S., Tewes, U., Schmidt, R. E., & Wagner, T. O. (1995). Beta-endorphin, but not substance-P, is increased by acute stress in humans. *Psychoneuroendocrinology*, *20*, 103–110.

Schmitt, M., Beckmann, M., Dusi, D., Maes, J., Schiller, A., & Schonauer, K. (2003). Messgüte des vereinfachten Beck-Depressions-Inventars (BDI-V). *Diagnostica*, *49*, 147–156. https://doi.org/10.1026//0012-1924.49.4.147

Schmitt, M., Maes, J., & Schmal, A. (1997). *Gerechtigkeit als innerdeutsches Problem : Analyse der Messeigenschaften von Indikatoren der seelischen Gesundheit*. Retrieved from http://psydok.psycharchives.de/jspui/handle/20.500.11780/121

Segal, D. L., Coolidge, F. L., Cahill, B. S., & O’Riley, A. A. (2008). Psychometric properties of the Beck Depression Inventory II (BDI-II) among community-dwelling older adults. *Behavior Modification*, *32*, 3–20. https://doi.org/10.1177/0145445507303833

Smillie, L. D., Yeo, G. B., Furnham, A. F., & Jackson, C. J. (2006). Benefits of all work and no play: the relationship between neuroticism and performance as a function of resource allocation. *The Journal of Applied Psychology*, *91*, 139–155. https://doi.org/10.1037/0021-9010.91.1.139

Spencer, B. W. J., Chilcot, J., & Farrington, K. (2011). Still sad after successful renal transplantation: are we failing to recognise depression? An audit of depression screening in renal graft recipients. *Nephron Clinical Practice*, *117*, c106–112. https://doi.org/10.1159/000319657

Stark, R., Hamm, A., Schienle, A., Walter, B., & Vaitl, D. (1999). Effects of Fear Induction on Heart Period Variability. *Journal of Psychophysiology*, *13*, 18–26. https://doi.org/10.1027//0269-8803.13.1.18

Steyer, R., Majcen, A.-M., Schwenkmezger, P., & Buchner, A. (1989). A latent state-trait anxiety model and its application to determine consistency and specificity coefficients. *Anxiety Research*, *1*, 281–299. https://doi.org/10.1080/08917778908248726

Stieger, S. (2013). Implicit anxiety: No evidence for a relation with childhood fears and parental rearing behaviour. *Psychologica Belgica*, *53*, 75–91.

Stieger, S., Göritz, A. S., & Burger, C. (2010). Personalizing the IAT and the SC-IAT: Impact of idiographic stimulus selection in the measurement of implicit anxiety. *Personality and Individual Differences*, *48*, 940–944. https://doi.org/10.1016/j.paid.2010.02.027

Stirn, A., Brähler, E., & Hinz, A. (2006). Prävalenz, Soziodemografie, mentale Gesundheit und Geschlechtsunterschiede bei Piercing und Tattoo. *PPmP - Psychotherapie · Psychosomatik · Medizinische Psychologie*, *56*, 445–449. https://doi.org/10.1055/s-2006-951817

Suslow, T. (1998). Differential validity of the Gottschalk-Gleser Anxiety Scales: Is gender a moderator variable? *Scandinavian Journal of Psychology*, *39*, 9–13.

Thienel, M., Heinrichs, M., Fischer, S., Ott, V., Born, J., & Hallschmid, M. (2014). Oxytocin’s impact on social face processing is stronger in homosexual than heterosexual men. *Psychoneuroendocrinology*, *39*, 194–203. https://doi.org/10.1016/j.psyneuen.2013.09.013

Thompson, A. H. (1975). Random responding and the questionnaire measurement of psychoticism. *Social Behavior and Personality*, *3*, 111–116. https://doi.org/10.2224/sbp.1975.3.2.111

Tröger, C., Ewald, H., Glotzbach, E., Pauli, P., & Mühlberger, A. (2012). Does pre-exposure inhibit fear context conditioning? A Virtual Reality Study. *Journal of Neural Transmission*, *119*, 709–719. https://doi.org/10.1007/s00702-011-0757-8

Tsapakis, E. M., Tsiridis, E., Hunter, A., Gamie, Z., Georgakarakos, N., Thomas, P., Schizas, C., & West, R. M. (2009). Modelling the effect of minor orthopaedic day surgery on patient mood at the early post-operative period: A prospective population-based cohort study. *European Psychiatry*, *24*, 112–118.

Unschuld, P. G., Ising, M., Specht, M., Erhardt, A., Ripke, S., Heck, A., Kloiber, S., Straub, V., Brueckl, T., Müller-Myhsok, B., & Binder, E. B. (2009). Polymorphisms in the GAD2 gene-region are associated with susceptibility for unipolar depression and with a risk factor for anxiety disorders. *American Journal of Medical Genetics,* *150B*, 1100–1109. https://doi.org/10.1002/ajmg.b.30938

Wardle, J., Steptoe, A., Gulis, G., Sartory, G., Sêk, H., Todorova, I., Vögele, C., & Ziarko, M. (2004). Depression, perceived control, and life satisfaction in university students from Central-Eastern and Western Europe. *International Journal of Behavioral Medicine*, *11*, 27–36. https://doi.org/10.1207/s15327558ijbm1101_4

Werner, N. S., Duschek, S., & Schandry, R. (2009). Relationships between affective states and decision-making. *International Journal of Psychophysiology*, *74*, 259–265. https://doi.org/10.1016/j.ijpsycho.2009.09.010

Werner, N. S., Schweitzer, N., Meindl, T., Duschek, S., Kambeitz, J., & Schandry, R. (2013). Interoceptive awareness moderates neural activity during decision-making. *Biological Psychology*, *94*, 498–506. https://doi.org/10.1016/j.biopsycho.2013.09.002

Wilding, J., & Hayes, S. (1992). Relations between approaches to studying and note-taking behaviour in lectures. *Applied Cognitive Psychology*, *6*, 233–246.

Wild, K., Scholz, M., Ropohl, A., Bräuer, L., Paulsen, F., & Burger, P. H. M. (2014). Strategies against burnout and anxiety in medical education--implementation and evaluation of a new course on relaxation techniques (Relacs) for medical students. *PloS One*, *9*, e114967. https://doi.org/10.1371/journal.pone.0114967

Wilkinson, L., Tai, Y. F., Lin, C. S., Lagnado, D. A., Brooks, D. J., Piccini, P., & Jahanshahi, M. (2014). Probabilistic classification learning with corrective feedback is associated with in vivo striatal dopamine release in the ventral striatum, while learning without feedback is not. *Human Brain Mapping*, *35*, 5106–5115. https://doi.org/10.1002/hbm.22536

Zunhammer, M., Eberle, H., Eichhammer, P., & Busch, V. (2013). Somatic Symptoms Evoked by Exam Stress in University Students: The Role of Alexithymia, Neuroticism, Anxiety and Depression. *PLOS ONE*, *8*, e84911. https://doi.org/10.1371/journal.pone.0084911
